# Supplementary material
Source: MDPI journal article supplement (https://www.mdpi.com/2311-7524/9/3/360)
Supplement: s1 [file s1 › Supplementary- Labarile et al..pdf]

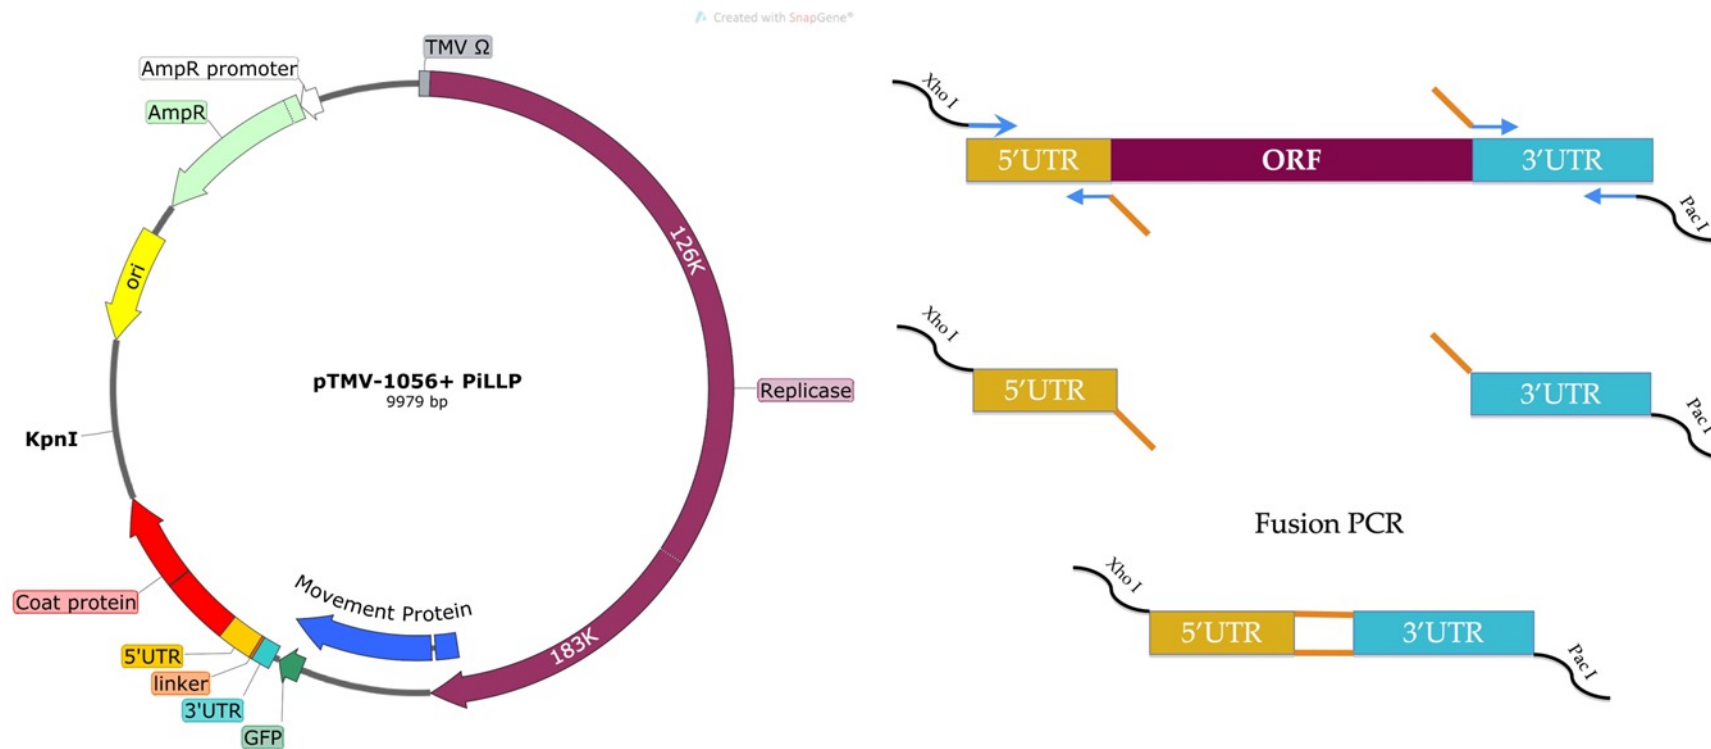

**Figure S1.** Construction of pTMV-PiLLP-1056 vector to express the 5'UTR+3'UTR of *PiLLP* in antisense orientation, under the TMV CP sgRNA promoter.
